# Supplementary material for: Influence of Gender and SNPs in GPX1 Gene on Biomarkers of Selenium Status in Healthy Brazilians
Source: PubMed Central journal article supplement (PMC4882653; doi:10.3390/nu8050081), 2016-05-05
Supplement: nutrients-08-00081-s001.pdf [file nutrients-08-00081-s001.pdf]

# Influence of Gender and SNPs in *GPX1* Gene on Biomarkers of Se Status in Healthy Brazilians

Janaina L. S. Donadio, Elvira M. Guerra-Shinohara, Marcelo M. Rogero and Silvia M. F. Cozzolino

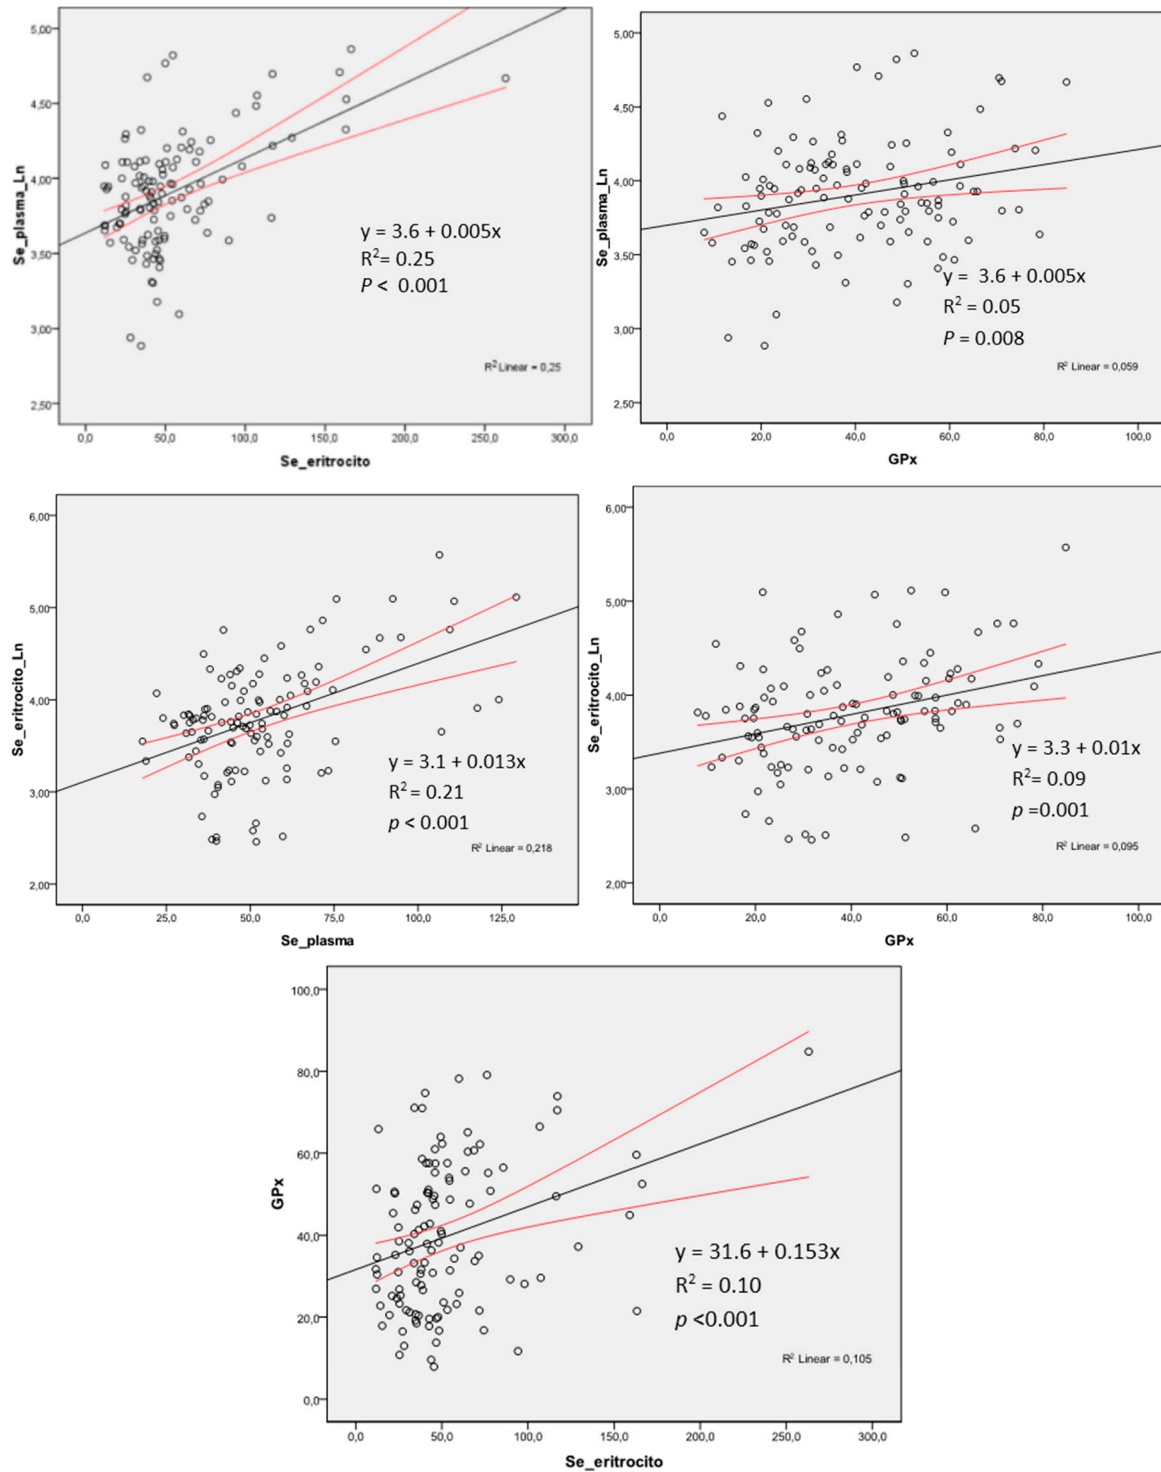

Figure S1. Association between biochemical variables in healthy subjects by linear regression.

**Table S1.** Relation between biochemical variables in healthy subjects by linear regression.

| <b>Dependent Variables</b>                     | <b>Independent Variables</b> | <b>R<sup>2</sup></b> | <b><math>\beta</math></b> | <b>Standard Error</b> | <b><i>p</i></b> |
|------------------------------------------------|------------------------------|----------------------|---------------------------|-----------------------|-----------------|
| Plasma Se( $\mu\text{g/L}$ ) <sup>1</sup>      | Erythrocyte Se               | 0.25                 | 0.005                     | 0.32                  | <0.001          |
| Erythrocyte Se( $\mu\text{g/L}$ ) <sup>1</sup> | Plasma Se                    | 0.21                 | 0.013                     | 0.53                  | <0.001          |
| GPx(U/g Hb)                                    | Plasma Se                    | 0.05                 | 0.199                     | 17.38                 | 0.009           |
|                                                | Erythrocyte Se               | 0.10                 | 0.153                     | 16.94                 | <0.001          |

<sup>1</sup> Dependent variables used as log transformed.
